# Supplementary material for: Reduced tumor growth in EP2 knockout mice is related to signaling pathways favoring an increased local anti-tumor immunity in the tumor stroma
Source: PubMed Central journal article supplement — Oncol Rep. 2022 May 11;47(6):118. doi: 10.3892/or.2022.8329 (PMC9115633; doi:10.3892/or.2022.8329), 2022-05-11
Supplement: Supplementary_Data.pdf [file Supplementary_Data.pdf]

**Table SI. Caliper readings and calculated MCG 101 tumor volumes.**

| Sex    | Genotype           | Animal no | Caliper readings (mm x mm) | Calculated tumor volume |
|--------|--------------------|-----------|----------------------------|-------------------------|
| Female | EP2 <sup>+/+</sup> | 1         | 15x15                      | 1,767.14                |
| Female | EP2 <sup>+/+</sup> | 5         | 13x13                      | 1,150.35                |
| Female | EP2 <sup>+/+</sup> | 6         | 7.5x7.5                    | 220.89                  |
| Female | EP2 <sup>+/+</sup> | 27        | 11x15                      | 1,150.35                |
| Female | EP2 <sup>+/+</sup> | 28        | 11.5x13                    | 962.51                  |
| Female | EP2 <sup>+/+</sup> | 45        | 19x17                      | 3,053.63                |
| Female | EP2 <sup>+/+</sup> | 53        | 13x13                      | 1,150.35                |
| Female | EP2 <sup>+/+</sup> | 66        | 14x14                      | 1,436.75                |
| Female | EP2 <sup>+/+</sup> | 68        | 12x15                      | 1,288.25                |
| Male   | EP2 <sup>+/+</sup> | 4         | 10x12                      | 696.91                  |
| Male   | EP2 <sup>+/+</sup> | 8         | 13x13                      | 1,150.35                |
| Male   | EP2 <sup>+/+</sup> | 9         | 14x14                      | 1,436.75                |
| Male   | EP2 <sup>+/+</sup> | 64        | 6x6                        | 113.10                  |
| Male   | EP2 <sup>+/+</sup> | 65        | 10x10                      | 523.60                  |
| Male   | EP2 <sup>+/+</sup> | 75        | 9x13                       | 696.91                  |
| Male   | EP2 <sup>+/+</sup> | 82        | 10x10                      | 523.60                  |
| Male   | EP2 <sup>+/+</sup> | 84        | 14 x14                     | 1,436.75                |
| Female | EP2 <sup>-/-</sup> | 10        | 11x11                      | 696.91                  |
| Female | EP2 <sup>-/-</sup> | 12        | 11x11                      | 696.91                  |
| Female | EP2 <sup>-/-</sup> | 30        | 9x13                       | 696.91                  |
| Female | EP2 <sup>-/-</sup> | 49        | 12x15                      | 1,288.25                |
| Female | EP2 <sup>-/-</sup> | 50        | 11.5x11.5                  | 796.33                  |
| Female | EP2 <sup>-/-</sup> | 51        | 13x13                      | 1,150.35                |
| Female | EP2 <sup>-/-</sup> | 54        | 10x11                      | 606.13                  |
| Female | EP2 <sup>-/-</sup> | 59B       | 11.5x11.5                  | 796.33                  |
| Male   | EP2 <sup>-/-</sup> | 15        | 1x1                        | 0.52                    |
| Male   | EP2 <sup>-/-</sup> | 38        | 10x12                      | 696.91                  |
| Male   | EP2 <sup>-/-</sup> | 81        | 5x5                        | 65.45                   |
| Male   | EP2 <sup>-/-</sup> | 86        | 11.5x12                    | 847.23                  |
| Male   | EP2 <sup>-/-</sup> | 89        | 10x10                      | 523.60                  |
| Male   | EP2 <sup>-/-</sup> | 90        | 10x11                      | 606.13                  |
| Male   | EP2 <sup>-/-</sup> | 95        | 11x12                      | 796.33                  |
| Male   | EP2 <sup>-/-</sup> | 99        | 13x13                      | 1,150.35                |

Tumor size was measured using caliper readings across two dimensions of the tumor the day before tissue harvest. Tumor size was assumed to be spherical and calculated according to the formula  $V=4/3*\pi*r^3$ . For non-symmetrical readings, the mean of the readings were used. The calculated tumor volume was significantly decreased in EP2<sup>-/-</sup> mice compared to EP2<sup>+/+</sup> mice. P<0.05, (t-test). EP2, prostaglandin E<sub>2</sub> receptor.
